# Supplementary material for: Dissecting the Causal Pathway from the Gut Microbiota to PCOS via Circulating Metabolite Mediation: Evidence from Mendelian Randomization, Single-cell and Bulk RNA Sequencing, Network Pharmacology, and In Vitro Tissue Validation
Source: Research Square preprint supplement (doi:10.21203/rs.3.rs-7028262/v1), 2025-07-07
Supplement: Supplementary file 1 [file 7877f6feb5316ac97101273b.xlsx]

## Sheet: Table S2
Table S2. GWAS Summary Data sourse
Phenotype	Consortium	Population	Sample size		Link	Accession number
			Case (n)	Control (n)
Gut microbiota(211 taxa)	MibioGen	Predominantly of European ancestry	18340		https://mibiogen.gcc.rug.nl/	ebi-a-GCST90016908 to ebi-a-GCST90017118
Metabolites	GWAS Catalog	Canadian	8299		https://www.ebi.ac.uk/gwas/downloads/summary-statistics	GCST90199621 to GCST90201020
Polycystic ovary syndrome	FinnGen biobank database	Predominantly of European ancestry	1909	241998	https://www.finngen.fi/en	E28.2
Polycystic ovary syndrome	Genotype-Tissue Expression Project	Predominantly of European ancestry	193		https://gtexportal.org/	/

## Sheet: Table S3
Table S3. Detailed information on the datasets included in this study
GEO Accession Number	Type of Sequencing Data	Cohort	Number of Sequencing Samples Included in This Study	Sample source	Platform
GSE118127	Single-Cell Sequencing	Five adult women	31	Ovarian stromal tissue and morphologically distinct antral follicles of varying diameters	GPL24676
GSE34526	Bulk RNA sequencing	Healthy control	3	Granulosa cells retrieved during oocyte aspiration in in vitro fertilization	GPL570
		PCOS	7
GSE137684	Bulk RNA sequencing	Healthy control	4	Granulosa cells retrieved during oocyte aspiration in in vitro fertilization	GPL17077
		PCOS	8

## Sheet: Table S4
Table S4. Primer sequences in qPCR.
Gene	Forward primer (5'-3')	Reverse primer (5'-3')
ATP13A4	CCAGCACGCTCTGCTCAATG	GAAGATGGATCCGGCAAGGC
IMMP2L	GTGATCGCGAGCATGTGT	CATGTTGTTCAAGCCTGACG
KCTD1	TCTACTCCAGCACAACTCACA	TGTGAGTTGTGCTGGAGTAGA
GAPDH	GGAAGCTTGTCATCAATGGAAATC	TGATGACCCTTTTGGCTCCC

## Sheet: Table S5 
Table S5.1. Results of the Mediator Mendelian Randomization Analysis on the Gut Microbiota (Exposure) – Metabolites (Mediator) – PCOS (Outcome) Pathway (High risk)
Exposure Variable ID	Mediator Factor ID	Outcome Measure ID	Direct Effect Estimate (β)	Mediator Effect Estimate	Mediator Effect CI Lower Bound	Mediator Effect CI Upper Bound	Mediator Effect Ratio Estimate	Mediator Effect Ratio CI Lower Bound	Mediator Effect Ratio CI Upper Bound	p value
GCST90017094	GCST90199702	finngen_R11_E4_PCOS	0.525216	0.0437827	0.00824061	0.0793249	0.0769469	0.0144826	0.139411	0.218003
GCST90017094	GCST90199767	finngen_R11_E4_PCOS	0.528449	0.04055	0.0156249	0.0654752	0.0712656	0.0274602	0.115071	0.103765
GCST90017094	GCST90199787	finngen_R11_E4_PCOS	0.530555	0.0384444	0.0129215	0.0639673	0.067565	0.0227091	0.112421	0.131998
GCST90017094	GCST90199967	finngen_R11_E4_PCOS	0.507815	0.0611844	0.025991	0.0963778	0.10753	0.0456785	0.169381	0.0821194
GCST90017094	GCST90200280	finngen_R11_E4_PCOS	0.532915	0.0360844	0.00338291	0.0687859	0.0634173	0.00594536	0.120889	0.269833
GCST90017094	GCST90200443	finngen_R11_E4_PCOS	0.491008	0.0779912	0.0400073	0.115975	0.137067	0.0703117	0.203823	0.0400466
GCST90017094	GCST90200585	finngen_R11_E4_PCOS	0.536078	0.0329211	0.0106627	0.0551795	0.0578579	0.0187394	0.0969764	0.139129
Table S5.2. Results of the Mediator Mendelian Randomization Analysis on the Gut Microbiota (Exposure) – Metabolites (Mediator) – PCOS (Outcome) Pathway (Low risk)
Exposure Variable ID	Mediator Factor ID	Outcome Measure ID	Direct Effect Estimate (β)	Mediator Effect Estimate	Mediator Effect CI Lower Bound	Mediator Effect CI Upper Bound	Mediator Effect Ratio Estimate	Mediator Effect Ratio CI Lower Bound	Mediator Effect Ratio CI Upper Bound	p value
GCST90016924	GCST90199719	finngen_R11_E4_PCOS	-0.401903	0.0416994	-0.0174391	0.100838	-0.115766	0.0484145	-0.279947	0.480739
GCST90017088	GCST90199771	finngen_R11_E4_PCOS	-0.443945	0.039441	0.0122137	0.0666682	-0.0975045	-0.0301942	-0.164815	0.147454
GCST90016971	GCST90200203	finngen_R11_E4_PCOS	-0.471385	0.020328	0.00530248	0.0353536	-0.0450675	-0.0117557	-0.0783793	0.176088
GCST90016971	GCST90200774	finngen_R11_E4_PCOS	-0.499621	0.0485636	0.0221708	0.0749564	-0.107666	-0.0491529	-0.166179	0.0657638

## Sheet: Table S6
Table S6.1. Results of Reverse Mendelian Randomization Analysis: PCOS as Exposure and Gut Microbiota as Outcomes
Exposure ID	Outcome ID	outcome	exposure	method	Number of SNPs	Beta	Standard Error	p-value	Lower Confidence Interval	Upper Confidence Interval	Odds Ratio	95% Lower Confidence Interval of OR	95% Upper Confidence Interval of OR
finngen_R11_E4_PCOS	GCST90017094	order.Burkholderiales.id.2874	PCOS	Inverse variance weighted	17	-0.00076732	0.0150134	0.959239	-0.0301936	0.028659	0.999233	0.970258	1.02907
finngen_R11_E4_PCOS	GCST90017094	order.Burkholderiales.id.2874	PCOS	MR Egger	17	0.0546412	0.0444529	0.237934	-0.0324866	0.141769	1.05616	0.968035	1.15231
finngen_R11_E4_PCOS	GCST90017094	order.Burkholderiales.id.2874	PCOS	Weighted median	17	0.0138136	0.0200513	0.490879	-0.025487	0.0531141	1.01391	0.974835	1.05455
finngen_R11_E4_PCOS	GCST90017094	order.Burkholderiales.id.2874	PCOS	Weighted mode	17	0.023132	0.030111	0.453543	-0.0358855	0.0821496	1.0234	0.964751	1.08562
Table S6.2. Results of Reverse Mendelian Randomization Analysis: PCOS as Exposure and Metabolites as Outcomes
Exposure ID	Outcome ID	outcome	exposure	method	Number of SNPs	Beta	Standard Error	p-value	Lower Confidence Interval	Upper Confidence Interval	Odds Ratio	95% Lower Confidence Interval of OR	95% Upper Confidence Interval of OR
finngen_R11_E4_PCOS	GCST90200443	Pseudouridine levels	Polycystic ovarian syndrome	Inverse variance weighted	31	0.00490466	0.0150535	0.744564	-0.0246002	0.0344095	1.00492	0.9757	1.03501
finngen_R11_E4_PCOS	GCST90200443	Pseudouridine levels	Polycystic ovarian syndrome	MR Egger	31	-0.012202	0.0299055	0.686258	-0.0708167	0.0464128	0.987872	0.931633	1.04751
finngen_R11_E4_PCOS	GCST90200443	Pseudouridine levels	Polycystic ovarian syndrome	Weighted median	31	0.00166355	0.0202522	0.934534	-0.0380307	0.0413578	1.00166	0.962683	1.04222
finngen_R11_E4_PCOS	GCST90200443	Pseudouridine levels	Polycystic ovarian syndrome	Weighted mode	31	-0.0090216	0.0332501	0.787999	-0.0741918	0.0561486	0.991019	0.928494	1.05775

## Sheet: Table S7
Table S7. eQTL Analysis Results – Chromosome, SNP, Base Pair Position, P-value, and Functional Annotation
Chromosome	Single Nucleotide Polymorphism	Base Pair	Annotation
2	rs62191117	239900775	2.79098962234897e-07 .
20	rs6087811	30596130	2.88374470043838e-07 .
4	rs4033856	45642485	5.66822628951172e-07 .
3	rs2367850	193456274	1.23614114729154e-06 ATP13A4(0)
5	rs62395635	173497796	2.90228187599499e-06 .
13	rs2321387	58689340	3.25786552112218e-06 .
3	rs7638039	70588939	4.8359298600467e-06 .
7	rs2613606	111285025	4.13356867481087e-06 IMMP2L(0)
9	rs72747231	84206018	3.76217331989077e-06 .
1	rs1928341	153240013	4.51508243317298e-06 .
18	rs9964679	26569901	6.05980677649389e-06 KCTD1(0)
4	rs1511453	23588462	8.00097093454904e-06 .
15	rs75242906	56786407	9.74519018105534e-06 .

## Sheet: Table S8
Table S8. Results of RT-PCR Analysis
Gene symbol	PCOS					Non-PCOS Control
ATP13A4	1	4.34	0.87	3.11	5.12	0.43	0.17	0.61	1.01	0.38
IMMP2L	1	0.91	1.12	0.88	1.31	4.14	1.33	2.11	1.01	5.15
KCTD1	1	1.21	1.13	0.87	1.14	3.31	2.01	1.88	2.03	1.45

## Sheet: Table S9
Table S9. Putative Transcription Factors Identified for ATP13A4, IMMP2L, and KCTD1 Based on Cistrome DB Predictions
Transcription factor	Gene Symbol	Transcription factor	Gene Symbol	Transcription factor	Gene Symbol
CEBPB	ATP13A4	FOXA1	IMMP2L	YY1	KCTD1
CHD8	ATP13A4	NR1H2	IMMP2L	PRDM1	KCTD1
OTX2	ATP13A4	POLR2A	IMMP2L	JARID2	KCTD1
KDM5B	ATP13A4	SUMO2	IMMP2L	SUMO2	KCTD1
NME2	ATP13A4	MYC	IMMP2L	POLR2A	KCTD1
AR	ATP13A4	GATA4	IMMP2L	CTCF	KCTD1
FOXA1	ATP13A4	BRD4	IMMP2L	EZH2	KCTD1
GATA3	ATP13A4	ESR1	IMMP2L	HSF1	KCTD1
POLR2A	ATP13A4	GRHL2	IMMP2L	FOXA2	KCTD1
NEUROD1	ATP13A4	CBX5	IMMP2L	ZNF468	KCTD1
HOXB13	ATP13A4	HDAC2	IMMP2L	EZH1	KCTD1
ESR1	ATP13A4	RNF2	IMMP2L	TET2	KCTD1
NR4A1	ATP13A4	ZBTB48	IMMP2L	EOMES	KCTD1
NR3C1	ATP13A4	FOXA2	IMMP2L	FOXA1	KCTD1
HDAC2	ATP13A4	RAD21	IMMP2L	ERG	KCTD1
RAD21	ATP13A4	BCLAF1	IMMP2L	KDM5B	KCTD1
NR1H3	ATP13A4	ORC2	IMMP2L	RAD21	KCTD1
Input	ATP13A4	POU2F2	IMMP2L	CDK9	KCTD1
CBX1	ATP13A4	CBX3	IMMP2L	BRD4	KCTD1
EHF	ATP13A4	MIXL1	IMMP2L	TRIM24	KCTD1
FAIRE	ATP13A4	AR	IMMP2L	MEF2B	KCTD1
MAFK	ATP13A4	TCF12	IMMP2L	ZNF460	KCTD1
ZSCAN16	ATP13A4	CBX1	IMMP2L	CTBP2	KCTD1
KDM4A	ATP13A4	NR0B1	IMMP2L	SPI1	KCTD1
FOXA2	ATP13A4	ZIM3	IMMP2L	H2AZ	KCTD1
PR	ATP13A4	GLI2	IMMP2L	KMT2A	KCTD1
EP300	ATP13A4	INO80	IMMP2L	RNF2	KCTD1
SPI1	ATP13A4	SMARCA4	IMMP2L	ESR1	KCTD1
STAT3	ATP13A4	LMNB1	IMMP2L	SMARCA4	KCTD1
DDX5	ATP13A4	ZNF140	IMMP2L	TFAP2A	KCTD1
HSF1	ATP13A4	NR3C1	IMMP2L	ZBTB7A	KCTD1
GRHL2	ATP13A4	RUNX1	IMMP2L	TCF7L2	KCTD1
ZIM3	ATP13A4	KDM5C	IMMP2L	FOXH1	KCTD1
TRIM28	ATP13A4	ZNF263	IMMP2L	RUNX1	KCTD1
EED	ATP13A4	SCML2	IMMP2L	TCF12	KCTD1
WDR5	ATP13A4	T	IMMP2L	SOX4	KCTD1
SMARCA4	ATP13A4	NANOG	IMMP2L	CEBPB	KCTD1
TEAD4	ATP13A4	TRIM28	IMMP2L	SUPT5H	KCTD1
BRD4	ATP13A4	FOXP1	IMMP2L	AFF4	KCTD1
SCRT2	ATP13A4	PMEL	IMMP2L	INO80	KCTD1
GATA1	ATP13A4	E2F5	IMMP2L	SMC1A	KCTD1
ERG	ATP13A4	HSF1	IMMP2L	INTS11	KCTD1
ARNT	ATP13A4	RUNX3	IMMP2L	KDM2B	KCTD1
CDK2	ATP13A4	MYBL2	IMMP2L	PR	KCTD1
AHR	ATP13A4	HOXC9	IMMP2L	ZNF222	KCTD1
MAX	ATP13A4	KDM1A	IMMP2L	RBBP5	KCTD1
JUND	ATP13A4	EP300	IMMP2L	EP300	KCTD1
STAG1	ATP13A4	YAP1	IMMP2L	ZNF674	KCTD1
CTCF	ATP13A4	RELA	IMMP2L	ZNF846	KCTD1
T	ATP13A4	H2AFZ	IMMP2L	ZBTB8A	KCTD1
MYC	ATP13A4	NIPBL	IMMP2L	CBFB	KCTD1
ASCL1	ATP13A4	TCF7L2	IMMP2L	BCL3	KCTD1
SMC1A	ATP13A4	MAFF	IMMP2L	TP63	KCTD1
GATA4	ATP13A4	MAFK	IMMP2L	PHOX2B	KCTD1
NR1H2	ATP13A4	NCOR1	IMMP2L	GATA6	KCTD1
TFAP4	ATP13A4	IRF1	IMMP2L	GATA3	KCTD1
RFX1	ATP13A4	FLI1	IMMP2L	RYBP	KCTD1
GATA6	ATP13A4	MED1	IMMP2L	SMC3	KCTD1
CTBP2	ATP13A4	HMBOX1	IMMP2L	PHIP	KCTD1
EMX1	ATP13A4	SPIB	IMMP2L	MED1	KCTD1
DPF2	ATP13A4	MAX	IMMP2L	GATA4	KCTD1
MEF2B	ATP13A4	SMAD1	IMMP2L	MAX	KCTD1
		STAT5B	IMMP2L	MITF	KCTD1
		NOTCH1	IMMP2L	ZNF257	KCTD1
		SPI1	IMMP2L	STAG1	KCTD1
		ZFX	IMMP2L	ZNF93	KCTD1
		NFE2	IMMP2L	HLF	KCTD1
		PIAS1	IMMP2L	BMI1	KCTD1
		CDK8	IMMP2L	ZNF263	KCTD1
		PAX5	IMMP2L	MYC	KCTD1
		EHMT2	IMMP2L	Input	KCTD1
		SMAD2/3	IMMP2L	CHD2	KCTD1
		STAT1	IMMP2L	ZNF440	KCTD1
		CSNK2A1	IMMP2L
		CBFB	IMMP2L
		ZBTB7A	IMMP2L
		CREB1	IMMP2L
		CREB3	IMMP2L
		NRF1	IMMP2L
		TP53	IMMP2L
		RELB	IMMP2L
		GATA1	IMMP2L
		H2AK119ub	IMMP2L
		STAT3	IMMP2L
		E2F1	IMMP2L
		MYB	IMMP2L
		ARRB1	IMMP2L
		MYCN	IMMP2L
		EGR1	IMMP2L
		HIRA	IMMP2L
		H2AZ	IMMP2L
		YY1	IMMP2L
		MXI1	IMMP2L
		MECP2	IMMP2L
		RPE	IMMP2L
		IRAK4	IMMP2L
		BCOR	IMMP2L
		MAZ	IMMP2L
		OTX2	IMMP2L
		ZNF788	IMMP2L
		TET2	IMMP2L
		ZNF639	IMMP2L
		BACH1	IMMP2L
		RBPJ	IMMP2L

## Sheet: Table S10
Table S10. miRNAs Predicted by miRcode to Be Associated with Key Genes
miRNA	mRNA	miRNA	mRNA	miRNA	mRNA
hsa-miR-10394-5p	ATP13A4	hsa-miR-1202	IMMP2L	hsa-miR-10395-3p	KCTD1
hsa-miR-10397-5p	ATP13A4	hsa-miR-1208	IMMP2L	hsa-miR-1185-5p	KCTD1
hsa-miR-10401-5p	ATP13A4	hsa-miR-1279	IMMP2L	hsa-miR-1193	KCTD1
hsa-miR-1205	ATP13A4	hsa-miR-153-5p	IMMP2L	hsa-miR-1261	KCTD1
hsa-miR-12122	ATP13A4	hsa-miR-1537-5p	IMMP2L	hsa-miR-1294	KCTD1
hsa-miR-1227-3p	ATP13A4	hsa-miR-16-2-3p	IMMP2L	hsa-miR-129-5p	KCTD1
hsa-miR-1227-5p	ATP13A4	hsa-miR-195-3p	IMMP2L	hsa-miR-135a-2-3p	KCTD1
hsa-miR-124-3p	ATP13A4	hsa-miR-200b-3p	IMMP2L	hsa-miR-135a-5p	KCTD1
hsa-miR-1299	ATP13A4	hsa-miR-200c-3p	IMMP2L	hsa-miR-135b-3p	KCTD1
hsa-miR-130b-5p	ATP13A4	hsa-miR-223-5p	IMMP2L	hsa-miR-135b-5p	KCTD1
hsa-miR-134-3p	ATP13A4	hsa-miR-29a-3p	IMMP2L	hsa-miR-153-3p	KCTD1
hsa-miR-143-3p	ATP13A4	hsa-miR-29b-3p	IMMP2L	hsa-miR-155-3p	KCTD1
hsa-miR-146a-3p	ATP13A4	hsa-miR-29c-3p	IMMP2L	hsa-miR-15a-5p	KCTD1
hsa-miR-147b-5p	ATP13A4	hsa-miR-302c-5p	IMMP2L	hsa-miR-15b-5p	KCTD1
hsa-miR-153-5p	ATP13A4	hsa-miR-3143	IMMP2L	hsa-miR-16-5p	KCTD1
hsa-miR-17-3p	ATP13A4	hsa-miR-3617-5p	IMMP2L	hsa-miR-190a-3p	KCTD1
hsa-miR-181a-3p	ATP13A4	hsa-miR-3674	IMMP2L	hsa-miR-195-5p	KCTD1
hsa-miR-1827	ATP13A4	hsa-miR-369-3p	IMMP2L	hsa-miR-204-5p	KCTD1
hsa-miR-186-3p	ATP13A4	hsa-miR-379-3p	IMMP2L	hsa-miR-211-5p	KCTD1
hsa-miR-20b-3p	ATP13A4	hsa-miR-380-3p	IMMP2L	hsa-miR-29a-3p	KCTD1
hsa-miR-2116-3p	ATP13A4	hsa-miR-3935	IMMP2L	hsa-miR-29b-3p	KCTD1
hsa-miR-22-5p	ATP13A4	hsa-miR-3972	IMMP2L	hsa-miR-29c-3p	KCTD1
hsa-miR-2467-3p	ATP13A4	hsa-miR-411-3p	IMMP2L	hsa-miR-3065-3p	KCTD1
hsa-miR-3064-5p	ATP13A4	hsa-miR-429	IMMP2L	hsa-miR-3138	KCTD1
hsa-miR-3085-3p	ATP13A4	hsa-miR-4443	IMMP2L	hsa-miR-3148	KCTD1
hsa-miR-3125	ATP13A4	hsa-miR-4446-5p	IMMP2L	hsa-miR-3163	KCTD1
hsa-miR-3144-5p	ATP13A4	hsa-miR-4471	IMMP2L	hsa-miR-3176	KCTD1
hsa-miR-3183	ATP13A4	hsa-miR-4504	IMMP2L	hsa-miR-3190-5p	KCTD1
hsa-miR-3200-5p	ATP13A4	hsa-miR-452-5p	IMMP2L	hsa-miR-3201	KCTD1
hsa-miR-324-3p	ATP13A4	hsa-miR-4527	IMMP2L	hsa-miR-323a-3p	KCTD1
hsa-miR-340-3p	ATP13A4	hsa-miR-4676-3p	IMMP2L	hsa-miR-340-5p	KCTD1
hsa-miR-34a-5p	ATP13A4	hsa-miR-4755-5p	IMMP2L	hsa-miR-34c-3p	KCTD1
hsa-miR-34c-5p	ATP13A4	hsa-miR-4775	IMMP2L	hsa-miR-3606-3p	KCTD1
hsa-miR-3613-3p	ATP13A4	hsa-miR-499a-3p	IMMP2L	hsa-miR-3679-5p	KCTD1
hsa-miR-362-5p	ATP13A4	hsa-miR-499b-3p	IMMP2L	hsa-miR-3680-3p	KCTD1
hsa-miR-3646	ATP13A4	hsa-miR-5006-3p	IMMP2L	hsa-miR-3685	KCTD1
hsa-miR-3650	ATP13A4	hsa-miR-510-5p	IMMP2L	hsa-miR-374c-5p	KCTD1
hsa-miR-3658	ATP13A4	hsa-miR-511-3p	IMMP2L	hsa-miR-384	KCTD1
hsa-miR-3662	ATP13A4	hsa-miR-5692b	IMMP2L	hsa-miR-3922-3p	KCTD1
hsa-miR-3665	ATP13A4	hsa-miR-5692c	IMMP2L	hsa-miR-424-5p	KCTD1
hsa-miR-3675-5p	ATP13A4	hsa-miR-5701	IMMP2L	hsa-miR-4282	KCTD1
hsa-miR-371b-5p	ATP13A4	hsa-miR-641	IMMP2L	hsa-miR-4328	KCTD1
hsa-miR-372-5p	ATP13A4	hsa-miR-6503-5p	IMMP2L	hsa-miR-4428	KCTD1
hsa-miR-373-5p	ATP13A4	hsa-miR-655-3p	IMMP2L	hsa-miR-4433b-5p	KCTD1
hsa-miR-3916	ATP13A4	hsa-miR-6748-5p	IMMP2L	hsa-miR-448	KCTD1
hsa-miR-3934-5p	ATP13A4	hsa-miR-6868-5p	IMMP2L	hsa-miR-450b-5p	KCTD1
hsa-miR-4261	ATP13A4	hsa-miR-6875-3p	IMMP2L	hsa-miR-4528	KCTD1
hsa-miR-4262	ATP13A4	hsa-miR-7-1-3p	IMMP2L	hsa-miR-4677-3p	KCTD1
hsa-miR-4263	ATP13A4	hsa-miR-7-2-3p	IMMP2L	hsa-miR-4687-3p	KCTD1
hsa-miR-4267	ATP13A4	hsa-miR-764	IMMP2L	hsa-miR-4711-3p	KCTD1
hsa-miR-4278	ATP13A4	hsa-miR-8059	IMMP2L	hsa-miR-4738-3p	KCTD1
hsa-miR-4323	ATP13A4	hsa-miR-892c-3p	IMMP2L	hsa-miR-4761-5p	KCTD1
hsa-miR-4326	ATP13A4			hsa-miR-4791	KCTD1
hsa-miR-4421	ATP13A4			hsa-miR-4797-5p	KCTD1
hsa-miR-4426	ATP13A4			hsa-miR-489-3p	KCTD1
hsa-miR-4427	ATP13A4			hsa-miR-497-5p	KCTD1
hsa-miR-449a	ATP13A4			hsa-miR-5011-5p	KCTD1
hsa-miR-449b-3p	ATP13A4			hsa-miR-507	KCTD1
hsa-miR-449b-5p	ATP13A4			hsa-miR-511-5p	KCTD1
hsa-miR-4501	ATP13A4			hsa-miR-513a-3p	KCTD1
hsa-miR-4504	ATP13A4			hsa-miR-513c-3p	KCTD1
hsa-miR-4505	ATP13A4			hsa-miR-514a-3p	KCTD1
hsa-miR-452-3p	ATP13A4			hsa-miR-514b-3p	KCTD1
hsa-miR-4529-3p	ATP13A4			hsa-miR-552-3p	KCTD1
hsa-miR-4645-3p	ATP13A4			hsa-miR-557	KCTD1
hsa-miR-4647	ATP13A4			hsa-miR-561-5p	KCTD1
hsa-miR-4662b	ATP13A4			hsa-miR-5701	KCTD1
hsa-miR-4680-3p	ATP13A4			hsa-miR-6083	KCTD1
hsa-miR-4684-5p	ATP13A4			hsa-miR-6134	KCTD1
hsa-miR-4698	ATP13A4			hsa-miR-651-3p	KCTD1
hsa-miR-4723-3p	ATP13A4			hsa-miR-655-3p	KCTD1
hsa-miR-4728-5p	ATP13A4			hsa-miR-665	KCTD1
hsa-miR-4768-3p	ATP13A4			hsa-miR-6731-3p	KCTD1
hsa-miR-4770	ATP13A4			hsa-miR-6747-3p	KCTD1
hsa-miR-4774-5p	ATP13A4			hsa-miR-6752-3p	KCTD1
hsa-miR-4778-5p	ATP13A4			hsa-miR-6830-3p	KCTD1
hsa-miR-4786-3p	ATP13A4			hsa-miR-6830-5p	KCTD1
hsa-miR-499b-5p	ATP13A4			hsa-miR-6832-3p	KCTD1
hsa-miR-500b-5p	ATP13A4			hsa-miR-6834-3p	KCTD1
hsa-miR-505-5p	ATP13A4			hsa-miR-6838-5p	KCTD1
hsa-miR-506-3p	ATP13A4			hsa-miR-6843-3p	KCTD1
hsa-miR-514a-5p	ATP13A4			hsa-miR-6847-3p	KCTD1
hsa-miR-518c-5p	ATP13A4			hsa-miR-6848-3p	KCTD1
hsa-miR-548ao-5p	ATP13A4			hsa-miR-6867-5p	KCTD1
hsa-miR-548au-3p	ATP13A4			hsa-miR-8065	KCTD1
hsa-miR-548ax	ATP13A4			hsa-miR-8068	KCTD1
hsa-miR-5683	ATP13A4			hsa-miR-8071	KCTD1
hsa-miR-5787	ATP13A4			hsa-miR-8081	KCTD1
hsa-miR-587	ATP13A4			hsa-miR-874-5p	KCTD1
hsa-miR-6088	ATP13A4			hsa-miR-889-5p	KCTD1
hsa-miR-6128	ATP13A4			hsa-miR-9983-3p	KCTD1
hsa-miR-616-5p	ATP13A4			hsa-miR-9986	KCTD1
hsa-miR-627-5p	ATP13A4
hsa-miR-6504-5p	ATP13A4
hsa-miR-662	ATP13A4
hsa-miR-6737-5p	ATP13A4
hsa-miR-6748-3p	ATP13A4
hsa-miR-6748-5p	ATP13A4
hsa-miR-6749-3p	ATP13A4
hsa-miR-6759-5p	ATP13A4
hsa-miR-6761-5p	ATP13A4
hsa-miR-676-3p	ATP13A4
hsa-miR-6765-3p	ATP13A4
hsa-miR-6769b-3p	ATP13A4
hsa-miR-6780a-5p	ATP13A4
hsa-miR-6793-5p	ATP13A4
hsa-miR-6819-5p	ATP13A4
hsa-miR-6827-3p	ATP13A4
hsa-miR-6840-3p	ATP13A4
hsa-miR-6847-3p	ATP13A4
hsa-miR-6859-5p	ATP13A4
hsa-miR-6868-3p	ATP13A4
hsa-miR-6880-5p	ATP13A4
hsa-miR-7160-5p	ATP13A4
hsa-miR-767-3p	ATP13A4
hsa-miR-8080	ATP13A4
hsa-miR-942-5p	ATP13A4
